# Supplementary material for: Impact of persistent barrier to gene flow and catastrophic events on red algae evolutionary history along the Chilean coast
Source: Front Genet. 2024 Mar 8;15:1336427. doi: 10.3389/fgene.2024.1336427 (PMC10957783; doi:10.3389/fgene.2024.1336427)
Supplement: Supplementary file 1 [file Table2.xls]

## Sheet: SupplTabla S2
Sequences used for Mazzaella phylogenetic reconstruction
Species	Collection data	Used for species delimitation analyses	Herbarium voucher	Genbank access COI	Genbank access rbcL	Reference
Mazzaella flaccida	Jade Cove, California, USA; coll. B. Clarkston and K. Hind	0	GWS021847	KF839786	KF839911	Saunders and Millar, 2014
Mazzaella sp. 2 flaccida	Soberanes Point, California, USA; coll. B. Clarkston, K. Hind and S. Toews	0	GWS021694	KF839876	KF839924	Saunders and Millar, 2014
Mazzaella phyllocarpa	British Columbia, Hot Spring Island (east "back" side), Gwaii Haanas, Canada; coll. G. W. Saunders and K. Dixon	0	GWS020450	KF839873	KF839923	Saunders and Millar, 2014
Mazzaella affinis	British Columbia, Newberry Cove (east side of western inlet), Gwaii Haanas, Canada; coll. G. W. Saunders and D. McDevit	0	GWS013559	HM916280	KF839926	Saunders and Millar, 2014
Mazzaella sp. 1 affinis	Sea Lion Point North (frontside), Point Lobos State Reserve, California, USA; coll. B. Clarkston and K. Hind	0	GWS021563	KF839814	KF839918	Saunders and Millar, 2014
Mazzaella californica	Santa Cruz (Four Mile) California, USA; coll. B. Clarkston, K. Hind and S. Toews	0	GWS022012	KF839800	KF839915	Saunders and Millar, 2014
Mazzaella linearis	Sea Lion Point North (frontside), Point Lobos State Reserve, California, USA; coll. B. Clarkston and K. Hind	0	GWS021533	KF839860	KF839922	Saunders and Millar, 2014
Mazzaella macrocarpa	British Columbia, Kye Bay, Vancouver Island, Canada; coll. B. Clarkson and D. McDevit	0	GWS004611	KF839849	KF839920	Saunders and Millar, 2014
Mazzaella minima	British Columbia, Indian Head, Skidegate, Haida Gwaii, Canada; coll. G. W. Saunders and K. Dixon	0	GWS020941	HQ545191	KF839914	Saunders and Millar, 2014
Mazzaella parksii	British Columbia, Saw Reef, Gwaii Haanas, Canada; coll. G. W. Saunders and K. Dixon	0	GWS020061	HQ544739	KF839917	Saunders and Millar, 2014
Mazzaella rosea	Sea Lion Point North (frontside), Point Lobos State Reserve, California, USA; coll. B. Clarkston and K. Hind	0	GWS021511	KF839811	KF839916	Saunders and Millar, 2014
Mazzaella sanguinea	British Columbia, Tahsis, Flowe Islet, Esperanza Channel, Canada; coll. G. W. Saunders and B. Clarkston	0	GWS010170	HM916161	KF839910	Saunders and Millar, 2014
Mazzaella oregona	British Columbia, Cowley Islands, Masset Inlet, Haida Gwaii, Canada; coll. G. W. Saunders and K. Dixon	0	GWS021136	HQ919418	KF839906	Saunders and Millar, 2014
Mazzaella sp. 1 oregona	Pigeon Point Lighthouse, California, USA; coll. B. Clarkston and K. Hind	0	GWS021358	KF839711	KF839905	Saunders and Millar, 2014
Mazzaella sp. 2 oregona	Jade Cove, California, USA; coll. B. Clarkston and K. Hind	0	GWS021846	KF839802	na	Saunders and Millar, 2014
Mazzaella sp. 3 oregona	Soberanes Point, California, USA; coll. B. Clarkston, K. Hind and S. Toews	0	GWS021697	KF839763	KF839909	Saunders and Millar, 2014
Mazzaella splendens	California, Santa Cruz (Four Mile), USA; coll. B. Clarkston, K. Hind and S. Toews	0	GWS022053	KF839756	KF839908	Saunders and Millar, 2014
Mazzaella volans	California, Santa Cruz (Four Mile), USA; coll. B. Clarkston, K. Hind and S. Toews	0	GWS021881	KF839787	KF839912	Saunders and Millar, 2014
Mazzaella japonica	British Columbia, Comox Marina Breakwater, Canada; coll. B. Clarkston, D. McDevit and K. Roy	0	GWS008553	KF839852	KF839921	Saunders and Millar, 2014
Mazzaella cornucopiae	Bodega Head, Sonoma Co., California, USA; coll. n. a.	0	na	na	U03377	Hommersand et al., 1994
Mazzaella dewreedei	Santa Cruz (Four Mile), California, USA; coll. B. Clarkson, K. Hind and S. Toews	0	GWS021931	KF839888	KF839925	Saunders and Millar, 2014
Mazzaella cobinae	Punta María, Baja California, Mexico; coll. J. R. Hughey	0	na	na	AF146210	Hommersand et al., 1993
Mazzaella heterocarpa	Seal Rock, Lincoln Co., Oregon, USA; coll. E. Henry	0	na	na	U03379	Hommersand et al., 1994
Mazzaella leptorhynchos	Jalama Beach State Park, Santa Barbara Co., California, USA; coll. n. a.	0	na	na	U03381	Hommersand et al., 1994
Mazzaella sp. 1	Punta María, Baja California, Mexico; coll. J. R. Hughey	0	JRH-1996-1	na	EU082423	na
Mazzaella sp. 2	Cape Douglas, Alaskan Peninsula, Alaska, USA; coll. P. W. Gabrielson	0	JRH-2008	na	EU930197	na
Mazzaella capensis	Kommetjie, Cape Peninsula, South Africa; coll. J. Bolton	0	na	na	U03083	Hommersand et al., 1994
Mazzaella convoluta	Kommetjie, Cape Peninsula, South Africa; coll. J. Bolton	0	na	na	U03084	Hommersand et al., 1994
Mazzaella canaliculata	Playa Mendieta, Reserva Nacional de Paracas, Perú; coll. S. Suárez	0	BG-434 IMARPE	MW382302	MW382294	Arakaki and Ramirez, 2021
Mazzaella sp. 3	Bahía de Pucusana, Lima, Perú; coll. N.Arakaki, M. Perez and P. Romero	1	BG-215, IMARPE-05-001439	na	MW382296	Arakaki and Ramirez, 2021
"Chondrus canaliculatus"	Punta Horcón, Valparaiso Prov., Chile; coll. S. Fredericq and M. E. Ramírez	0	na	na	AF146199	Hommersand et al., 1999
Mazzaella "affinis"	Caleta Errazuriz, Antofagasta, Chile; coll. M. E. Ramírez	1	na	na	AF146209	na
Mazzaella laminarioides	Los Burros, Chile; coll. M. L. Guillemin	1	na	JQ408412*	JQ408398*	Montecinos et al., 2012
Mazzaella laminarioides	Puerto Oscuro, Chile; coll. M. L. Guillemin	1	na	JQ408413	JQ408400	Montecinos et al., 2012
Mazzaella laminarioides	Maitencillo, Chile; coll. M. L. Guillemin	1	na	JQ408415	na	Montecinos et al., 2012
Mazzaella laminarioides	Maitencillo, Chile; coll. S. Faugeron	1	na	JQ408414	JQ408401	Montecinos et al., 2012
Mazzaella laminarioides	Pichilemu, Chile; coll. M. L. Guillemin	1	na	JQ408417	na	Montecinos et al., 2012
Mazzaella laminarioides	Topocalma, Chile; coll. S. Faugeron	1	na	JQ408421	na	Montecinos et al., 2012
Mazzaella laminarioides	Pichilemu, Chile; coll. M. L. Guillemin	1	na	JQ408418	na	Montecinos et al., 2012
Mazzaella laminarioides	Concepción, Chile; coll. C. Destombe and V. Opplinger	1	na	JQ408420*	JQ408403*	Montecinos et al., 2012
Mazzaella laminarioides	Pichilemu, Chile; coll. M. L. Guillemin	1	na	JQ408416	na	Montecinos et al., 2012
Mazzaella laminarioides	Pichilemu, Chile; coll. M. L. Guillemin	1	na	JQ408419	na	Montecinos et al., 2012
Mazzaella laminarioides	Puerto Aguirre, Chile; coll. S. Faugeron and E. Martinez	1	na	JQ408422	na	Montecinos et al., 2012
Mazzaella laminarioides	Chiloé, Chile; coll. M. L. Guillemin	1	na	JQ408430	na	Montecinos et al., 2012
Mazzaella laminarioides	Pucatrihue, Chile; coll. M. L. Guillemin	1	na	JQ408423	na	Montecinos et al., 2012
Mazzaella laminarioides	Pucatrihue, Chile; coll. M. L. Guillemin	1	na	JQ408427	na	Montecinos et al., 2012
Mazzaella laminarioides	Chiloé, Chile; coll. M. L. Guillemin	1	na	JQ408429	na	Montecinos et al., 2012
Mazzaella laminarioides	Pilolcura, Chile; col. M. L. Guillemin	1	na	JQ408424*	JQ408405*	Montecinos et al., 2012
Mazzaella laminarioides	Pilolcura, Chile; coll. M. L. Guillemin	1	na	JQ408425	na	Montecinos et al., 2012
Mazzaella laminarioides	Pilolcura, Chile; coll. M. L. Guillemin	1	na	JQ408426	JQ408406	Montecinos et al., 2012
Mazzaella laminarioides	Nigue, Chile; coll. M. L Guillemin and O. R. Huanel	1	na	OK422937	na	This study
Mazzaella laminarioides	Nigue, Chile; coll. M. L Guillemin and O. R. Huanel	1	na	OK422943	na	This study
Mazzaella laminarioides	Concepción, Chile; coll. C. Destombe and V. Opplinger	1	na	na	JQ408402	Montecinos et al., 2012
Mazzaella laminarioides	Topocalma, Chile; coll. S. Faugeron	1	na	na	JQ408404	Montecinos et al., 2012
Mazzaella laminarioides	Chiloé, Chile; coll. M. L Guillemin	1	na	na	JQ408407	Montecinos et al., 2012
Mazzaella membranacea	West of Harbour, pools, Saint Helena, Tristan; coll. S. Scott	1	Tristan 2010 018	MK202427	na	Saunders et al., 2019
Mazzaella membranacea	Runaway Beach, Saint Helena, Tristan; coll. S. Scott	1	TR07.R001	MK202375*	MK185771*	Saunders et al., 2019
Mazzaella membranacea	West of Harbour, pools, Saint Helena, Tristan; coll. S. Scott	1	Tristan 2010 077	MK202374	na	Saunders et al., 2019
Mazzaella membranacea	West end of Volcano, Saint Helena, Tristan; coll. S. Scott	1	TR05.R68	na	MK185828	Saunders et al., 2019
Mazzaella membranacea	Puerto Oscuro, Chile; coll. M. L Guillemin	1	na	OK422953	na	This study
Mazzaella sp. 1	Maitencillo, Chile; coll. M. L Guillemin	1	na	OK422945	na	This study
Mazzaella sp. 1	Maitencillo, Chile; coll. M. L Guillemin	1	na	OK422946	na	This study
Mazzaella sp. 1	Maitencillo, Chile; coll. M. L Guillemin	1	na	OK422944*	OK423429*	This study
Mazzaella membranacea	Matanza, Chile; coll. M. L Guillemin	1	na	OK422969	OK423433	This study
Mazzaella membranacea	Matanza, Chile; coll. M. L Guillemin	1	na	OK422974	na	This study
Mazzaella membranacea	Matanza, Chile; coll. M. L Guillemin	1	na	OK422980	na	This study
Mazzaella membranacea	Pichilemu, Chile; coll. M. L Guillemin	1	na	OK422981	na	This study
Mazzaella membranacea	Constitución, Chile; coll. M. L Guilllemin	1	na	OK422999	na	This study
Mazzaella membranacea	Constitución, Chile; coll. M. L Guilllemin	1	na	OK423001	na	This study
Mazzaella membranacea	Constitución, Chile; coll. M. L Guilllemin	1	na	OK423005	na	This study
Mazzaella membranacea	Concepción, Chile; coll. M. L Guilllemin	1	na	OK423009	na	This study
Mazzaella membranacea	Concepción, Chile; coll. M. L Guilllemin	1	na	OK423025	na	This study
Mazzaella membranacea	Tirua, Chile; coll. M. L Guilllemin	1	na	OK423028	na	This study
Mazzaella membranacea	Tirua, Chile; coll. M. L Guilllemin	1	na	OK423029	na	This study
Mazzaella membranacea	Loberia, Chile; coll. M. L. Guillemin and O. R. Huanel	1	na	OK423036*	OK423436*	This study
Mazzaella membranacea	Loberia, Chile; coll. M. L. Guillemin and O. R. Huanel	1	na	OK423037	na	This study
Mazzaella membranacea	Loberia, Chile; coll. M. L. Guillemin and O. R. Huanel	1	na	OK423044	na	This study
Mazzaella membranacea	Nigue, Chile; coll. M. L. Guillemin and O. R. Huanel	1	na	OK423051	na	This study
Mazzaella membranacea	Nigue, Chile; coll. M. L. Guillemin and O. R. Huanel	1	na	OK423055	na	This study
Mazzaella membranacea	Pucatrihue, Chile; coll. M. L. Guillemin	1	na	OK423076	OK423435	This study
Chondracanthus intermedius	Taean, Korea; coll. S. M. Boo, 22.viii.2006	0	CNU042987	KU640325	KU640261	Calderon and Boo, 2016b
Chondracanthus exasperatus	Bamfield, Wizard I., British Columbia, Canada; coll. G. W. Saunders	0	GWS002829	GQ398091	JN403073	Saunders and Millar, 2014
Gigartina pistillata	Santec, Brittany, France; coll. J. Cabioch	0	na	na	U03429	Hommersand et al., 1994
Gigartina pistillata	Brittany, Santec_1, France; coll. L. Le Gall and M. Camusat	0	RMAR1575	KJ960718	na	Direct Submission
Sequences used for Asterfilopsis and Ahnfeltiopsis phylogenetic reconstructions
Acletoa tarazonae	Barranco, Lima, Peru; coll. M. S. Calderon	1	CNU029249	na	KY924618	Calderon and Boo, 2017
Ahnfeltiopsis sp. 1	Los Burros, Chile; coll. M. L. Guillemin	1	na	OK423096*	OK423437*	This study
Ahnfeltiopsis sp. 2	Puerto Oscuro, Chile; coll. M. L. Guillemin	1	na	OK423107	OK423438	This study
Ahnfeltiopsis sp. 2	Puerto Oscuro, Chile; coll. M. L. Guillemin	1	na	OK423110	na	This study
Ahnfeltiopsis sp. 2	Maitencillo, Chile; coll. M. L. Guillemin	1	na	OK423130	na	This study
Ahnfeltiopsis sp. 2	Maitencillo, Chile; coll. M. L. Guillemin	1	na	OK423119*	OK423439*	This study
Ahnfeltiopsis sp. 2	Maitencillo, Chile; coll. M. L. Guillemin	1	na	OK423117	na	This study
Ahnfeltiopsis sp. 2	Maitencillo, Chile; coll. M. L. Guillemin	1	na	OK423124	na	This study
Ahnfeltiopsis sp. 2	Maitencillo, Chile; coll. M. L. Guillemin	1	na	OK423131	na	This study
Ahnfeltiopsis vermicularis	Matanza, Chile; coll. M. L. Guillemin	1	na	OK423139	OK423440	This study
Ahnfeltiopsis vermicularis	Loberia, Chile; coll. M. L. Guillemin	1	na	OK423203*	OK423441*	This study
Ahnfeltiopsis vermicularis	Concepción, Chile; coll. M. L. Guillemin	1	na	OK423183	na	This study
Ahnfeltiopsis vermicularis	Tirua, Chile; coll. M. L. Guillemin	1	na	OK423188	na	This study
Ahnfeltiopsis vermicularis	Tirua, Chile; coll. M. L. Guillemin	1	na	OK423202	na	This study
Ahnfeltiopsis vermicularis	Pilolcura, Chile; coll. M. L. Guillemin	1	na	OK423248	na	This study
Ahnfeltiopsis vermicularis	Chiloé, Chile; coll. M. L. Guillemin	1	na	OK423288	OK423442	This study
Ahnfeltiopsis vermicularis	Nigue, Chile; coll. M. L. Guillemin and O. R. Huanel	1	na	OK423245	na	This study
Ahnfeltiopsis vermicularis	Pucatrihue, Chile; coll. M. L. Guillemin	1	na	OK423268	na	This study
Ahnfeltiopsis vermicularis	Pucatrihue, Chile; coll. M. L. Guillemin	1	na	OK423264	na	This study
Ahnfeltiopsis vermicularis	Pucatrihue, Chile; coll. M. L. Guillemin	1	na	OK423275	na	This study
Ahnfeltiopsis vermicularis	Chiloé, Chile; coll. M. L. Guillemin	1	na	OK423278	OK423443	This study
Ahnfeltiopsis sp. 3	Pichilemu, Chile; coll. M. L. Guillemin	1	na	OK423159	na	This study
Ahnfeltiopsis vermicularis	Smitswinkel Bay, False Bay, Cape Peninsula, South Africa; coll. R. J. Anderson	1	na	na	AF388560	Fredericq et al., 2002
Ahnfeltiopsis vermicularis	Puntilloi, Pichilemu, Chile; coll. S. M. Boo and A. Mansilla	1	CNU026279	na	ATC34655	Calderon and Boo, 2017
Gymnogongrus sp.	La Herradura, Coquimbo, Chile; coll. S. Fredericq and M. E. Ramirez	1	na	na	AF388564	Fredericq et al., 2002
Ahnfeltiopsis chnoosporoides	Xom Con, Nha Trang, Khánh Hoà, Vietnam; coll. S. M. Boo	0	CNU066866	KU640274	KU640205	Calderon and Boo, 2016a
Ahnfeltiopsis linearis	Strawberry Hill, Oregon, USA; coll. S. M. Boo and E. C. Yang	0	CNU047648	KU640334	KU640223	Calderon and Boo, 2016a
Gymnogongrus guadalupensis	La Silica, Baja California, Mexico; coll. R. Riosmena-Rodriguez	0	CNU060613	KU640330	KU640267	Calderon and Boo, 2016a
Gymnogongrus martinensis	La Butadon, Baja California, Mexico; coll. M. H. Hommersand	0	M.H.Hommersand6.vii.1996	na	AY135162	Fredericq et al., 2002
Gymnogongrus sp.	La Bufadora, southwestern tip of Punta Banda, Baja California, Mexico; coll. J. Hughey	0	na	na	AF388570	Fredericq et al., 2002
Archestenogramma profundum	Cathedral Rock off Castle Harbour, Bermuda; coll. C. W. Schneider	0	BDA0365	HQ933374	JN403075	Schneider et al., 2011
Asterfilopsis centralis	Pisco, Ica, Peru; coll. na	1	CNU030468	KU640322*	na	Calderon and Boo, 2016a
Asterfilopsis centralis	Barranco, Lima, Perú; coll. M. S. Calderon	1	CNU029261	na	KU640252*	Calderon and Boo, 2016a
Asterfilopsis centralis	Perú; coll. na	1	CNU020314	na	KU640255	Calderon and Boo, 2016a
Asterfilopsis centralis	Perú; coll. na	1	CNU020318	na	KU640257	Calderon and Boo, 2016a
Asterfilopsis centralis	Perú; coll. na	1	CNU029260	na	KU640251	Calderon and Boo, 2016a
Asterfilopsis centralis	Perú; coll. Na	1	CNU029255	na	KU640250	Calderon and Boo, 2016a
Asterfilopsis furcellata	Ancon, Lima, Perú; coll. M. S. Calderon	1	CNU067233	KU640303*	KU640238*	Calderon and Boo, 2016a
Asterfilopsis piurana	Yacila, Piura, Perú; coll. M. S. Calderon	1	CNU049208	KU640310*	KU640245*	Calderon and Boo, 2016a
Asterfilopsis sp.	Ancon, Lima, Perú; coll. M. S. Calderon	1	CNU067231	KU640323*	KU640259*	Calderon and Boo, 2016a
Asterfilopsis disciplinalis	Matanza, Chile; coll. M. L. Guillemin	1	na	OK423301*	OK423444*	This study
Asterfilopsis disciplinalis	Constitucion, Chile; coll. M. L. Guillemin	1	na	OK423320	na	This study
Asterfilopsis disciplinalis	Pichilemu, Chile; coll. M. L. Guillemin	1	na	OK423305	na	This study
Asterfilopsis disciplinalis	Pichilemu, Chile; coll. M. L. Guillemin	1	na	OK423310	na	This study
Asterfilopsis disciplinalis	Constitucion, Chile; coll. M. L. Guillemin	1	na	OK423323	na	This study
Asterfilopsis disciplinalis	Tirua, Chile; coll. M. L. Guillemin	1	na	OK423355	na	This study
Asterfilopsis disciplinalis	Loberia, Chile; coll. M. L. Guillemin and O. R. Huanel	1	na	OK423370	na	This study
Asterfilopsis disciplinalis	Nigue, Chile; coll. ML Guillemin and O. R. Huanel	1	na	OK423373	na	This study
Asterfilopsis disciplinalis	Pilolcura, Chile; coll. M. L. Guillemin	1	na	OK423390	na	This study
Asterfilopsis disciplinalis	Chiloé, Chile; coll. M. L. Guillemin	1	na	OK423422	OK423445	This study
Asterfilopsis disciplinalis	Chiloé, Chile; coll. M. L. Guillemin	1	na	OK423423	na	This study
Asterfilopsis disciplinalis	Calbuco, Llanquihue, Chile; coll. S. M. Boo, xi.2005	1	CNU026318	na	KU640231	Calderon and Boo, 2016a
Asterfilopsis disciplinalis	La Puntilla, Pichilemu, Chile; coll. S. M. Boo, 18.ii.2013	1	CNU026278	na	KU640235	Calderon and Boo 2016a
Asterfilopsis disciplinalis	La Puntilla, Pichilemu, Chile; coll. S. M. Boo, 18.ii.2013	1	CNU026280	KU640301	KU640236	Calderon and Boo 2016a
Gymnogongrus sp.	La Herradura, Coquimbo, Chile; coll. S. Fredericq and M. E. Ramirez	1	na	na	AF388565	Direct submission
Ahnfeltiopsis polyclada	Kalk Bay, Cape Peninsula, South Africa; coll. R. J. Anderson	1	na	na	AF388558	Fredericq et al., 2002
Gymnogongrus sp.	Mar del Plata, Argentina; coll. J. Estevez	1	na	na	AF388561	Fredericq et al., 2002
Ahnfeltiopsis sp.	Muroran, Hokkaido, Japan; coll. S. Fredericq	0	na	na	AF388569	Fredericq et al., 2002
Besa catenata	Nujeokgeum, Oeyondo, Korea; coll. I. S. Hong, K. K. Oh, H. M. Jeong and D. Y. Bae	0	CNU012019	KU749573	KU749556	Calderon et al., 2016
Besa divaricata	Rice Bay, Vladivostok, Russia; coll. S. M. Boo and T. Krupnova	0	CNU025948	KU749576	KU749560	Calderon et al., 2016
Ahnfeltiopsis leptophylla	Agate Beach, California, USA; coll. S. M. Boo and G. H. Boo	0	CNU033907	KU640289	KU640222	Calderon and Boo, 2016a
Besa papillaeformis	Tahsis, British Columbia, Canada; coll. G. W. Saunders and B. Clarkston	0	GWS009621	GQ380035	GQ338146	Le Gall and Saunders, 2010
Ahnfeltiopsis paradoxa	Choshi, Chiba, Japan; coll. S. M. Boo	0	CNU047618	KU640291	KU640225	Calderon and Boo, 2016a
Coccotylus brodiei	Maine, USA; coll. G. W. Saunders, L. LeGall, D. McDevit, S. Clayden and C. Lane	0	GWS003640	GQ380037	GQ338135	Le Gall and Saunders, 2010
Coccotylus hartzii	Cable Head, Prince Edward Island, Canada; coll. B. Clarkston, K. Dixon and K. Roy	0	GWS008787	GQ380068	GQ338136	Le Gall and Saunders, 2010
Coccotylus truncatus	Manitoba, Canada; coll. G. W. Saunders, B. Clarkston and D. McDevit	0	GWS005213	GQ380071	GQ338134	Le Gall and Saunders, 2010
Erythrodermis traillii	New Brunswick, Canada; coll. G. W. Saunders, D. Saunders, L. LeGall and D. McDevit	0	GWS005655	GQ380105	GQ338133	Le Gall and Saunders, 2010
Fredericqia chiton	Point Holmes, British Columbia, Canada; coll. G. W. Saunders B. Clarkston, D. McDevit and K. Roy	0	GWS008640	GQ380107	GQ338149	Le Gall and Saunders, 2010
Fredericqia decewii	Pachena Beach, Bamfield, Canada; coll. D. McDevit, B. Clarkston, K. Roy and H. Kucera	0	GWS008273	GQ380018	GQ338150	Le Gall and Saunders, 2010
Fredericqia deveauniensis	Cape Neddick, Maine, USA; coll. G. W. Saunders and D. McDevit	0	GWS005620	GQ380113	GQ338151	Le Gall and Saunders, 2010
Ahnfeltiopsis concinna	Black sand beach, Hawaii; coll. S. M. Boo	0	CNU033888	na	KU640208	Calderon and Boo, 2016a
Ahnfeltiopsis concinna	Guerrero, Mexico; coll. D. Rodriguez	0	na	na	AY135161	Fredericq and Lopez-Bautista, 2002
Ahnfeltiopsis devoniensis	Castillo San Anton, La Coruña, Spain; coll. P. J. L. Geraldino and G. H. Boo	0	CNU060611	KU640277	KU640209	Calderon and Boo, 2016a
Ahnfeltiopsis fastigiata	Robe, South Australia, Australia; coll. E. C. Yang and W. J. Lee	0	CNU047646	KU640282	KU640214	Calderon and Boo, 2016a
Ahnfeltiopsis flabelliformis	Yantai, China; coll. S. M. Boo and K. M. Kim	0	CNU030899	KU640283	KU640215	Calderon and Boo, 2016a
Ahnfeltiopsis pusillus	Tarifa, Cadiz, Spain; coll. K. M. Kim and K. M. Lee	0	CNU034181	KU640292	KU640226	Calderon and Boo, 2016a
Ahnfeltiopsis pygmaeus	Goa, India; coll. S. M. Boo and G. H. Boo	0	CNU062755	KU640294	KU640228	Calderon and Boo, 2016a
Gymnogongrus caespitosus	Yacila, Paita, Perú; coll. M. S. Calderon	0	CNU049209	na	KY924622	Calderon and Boo, 2017
Gymnogongrus durvillei	Barranco, Lima Perú; coll. M. S. Calderon	0	CNU049931	na	KY924626	Calderon and Boo, 2017
Gymnogongrus durvillei	Yacila, Paita, Perú; coll. M. S. Calderon	0	CNU030461	na	KY924624	Calderon and Boo, 2017
Gymnogongrus durvillei	Lobitos, Talara, Perú; coll. M. S. Calderon	0	CNU030463	na	KY924625	Calderon and Boo, 2017
Gymnogongrus griffithsiae	Praia Rasa, Buzios, Brazil; coll. S. M. Boo, K. M. Lee and M. Fujii	0	CNU013009	KU640329	KU640266	Calderon and Boo, 2016a
Mastocarpus pachenicus	Bradys Beach, Bamfield, British Columbia, Canada; coll. G. W. Saunders	0	GWS001331	GQ380174	GQ338145	Le Gall and Saunders, 2010
Mastocarpus papillatus	Dixon I., Bamfield, British Columbia, Canada; coll. G. W. Saunders	0	GWS010642	GQ380225	GQ338137	Le Gall and Saunders, 2010
Mastocarpus alaskensis	Botanical Beach, British Columbia, Canada; coll. G. W. Saunders, B. Clarkston and D. McDevit	0	GWS004391	GQ380241	GQ338138	Le Gall and Saunders, 2010
Mastocarpus pacificus	Urakawa, Hokkaido, Japan; coll. J. K. Park	0	CNU042554	na	KU640268	Calderon and Boo, 2016a
Mastocarpus stellatus	Dunstaffnage, Argyll and Bute, Scotland, U.K.; coll. E. C. Yang	0	CNU055537	na	KU640269	Calderon and Boo, 2016a
Mastocarpus vancouveriensis	Bradys Beach, Bamfield, British Columbia, Canada; coll. G. W. Saunders, B. Clarkston and D. McDevit	0	GWS004004	GQ380319	GQ338141	Le Gall and Saunders, 2010
Ahnfeltiopsis complicata	Hondeklip Bay, Northern Cape Peninsula, South Africa; coll. R. J. Anderson	0	na	na	AF388555	Fredericq et al., 2002
Ahnfeltiopsis glomerata	Oudekraal, Cape Peninsula, South Africa; coll. R. J. Anderson	0	na	na	AF388552	Fredericq et al., 2002
Ahnfeltiopsis humilis	Pilot’s Beach, Dunedin, New Zealand; coll. na	0	na	na	AF388566	Fredericq et al., 2002
Ahnfeltiopsis sp.	Kingscote, Kangaroo Island, Australia; coll. E. C. Yang and W. J. Lee	0	CNU047640	KU640295	KU640229	Calderon and Boo, 2016a
Gymnogongrus crenulatus	Castillo San Anton, La Coruña, Spain; coll. P. J. L. Geraldino and G. H. Boo	0	CNU060612	KU640327	KU640264	Calderon and Boo, 2016a
Gymnogongrus dilatatus	Oudekraal, Cape Peninsula, South Africa; coll. R. J. Anderson	0	na	na	AF388551	Fredericq et al., 2002
Gymnogongrus sp.	Rookery Bay; Falkland Island; coll. S. Fredericq and M. H. Hommersand	0	na	na	AF388563	Fredericq et al., 2002
Gymnogongrus turquetii	Arthur Harbor, Anvers I., Antarctic Peninsula; coll. R. L. Moe	0	na	na	U27018	Direct submission
Phyllophora herediae	Le Trez Hir, Brittany, France; coll. J. Cabioch	0	J. Cabioch 27.02.1994	na	AY135165	Fredericq et al., 2002
Phyllophora pseudoceranoides	Cape Breton, Nova Scotia, Canada; coll. G. W. Saunders, L. LeGall, D. McDevit, S. Clayden and C. Lane	0	GWS003648	GQ380367	GQ338132	Le Gall and Saunders, 2010
Ozophora clevelandii	Santa Cruz, California, USA; coll. B. Clarkston, K. Hind and S. Toews	0	GWS022005	KF641915	KF641917	Maggs et al., 2013
Ozophora lanceolata	Bradys Beach, Bamfield, British Columbia, Canada; coll. G. W. Saunders, B. Clarkston and D. McDevit	0	GWS004011	GQ380341	GQ338128	Le Gall and Saunders, 2010
Ozophora norrisii	Tuwanek, British Columbia, Canada; coll. G. W. Saunders, B. Clarkston, D. McDevit and K. Roy	0	GWS008455	GQ380349	GQ338129	Le Gall and Saunders, 2010
Petroglossum pacificum	La Boca, Navidad, Chile; coll. S. Fredericq and M. E. Ramirez	0	S. Fredericq and M. E. Ramirez 17.i.1995	na	AY135167	Fredericq et al., 2002
Phyllophora crispa	Mullaghmore Head, Ireland; coll. G. W. Saunders	0	GWS001813	GQ380357	GQ338131	Le Gall and Saunders, 2010
Phyllophora sp.	Llanca, Catalonia, Spain; coll. L. LeGall	0	LLG0424	GQ380359	GQ338130	Le Gall and Saunders, 2010
Phyllophorella humboldtiana	La Punta, Callao, Perú; coll. M. S. Calderon	0	CNU049893	na	KX671327	Calderon and Boo, 2016b
Phyllophorella limaensis	Barranco, Lima, Perú; coll. M. S. Calderon	0	CNU049946	na	KX671332	Calderon and Boo, 2016b
Phyllophorella peruviana	Barranco, Lima, Perú; coll. M. S. Rios	0	CNU066710	na	KX671336	Calderon and Boo, 2016b
Schottera koreana	Namyeodo, Geoje, Korea; coll. T. H. Seo	0	CNU025314	KU749579	KU749567	Calderon et al., 2016
Schottera nicaeensis	Queenscliff Jetty, Australia; coll. G. W. Saunders	0	GWS002452	GQ380372	GQ338122	Le Gall and Saunders, 2010
Stenogramma bamfieldiense	British Columbia, Canada; coll. G. W. Saunders, B. Clarkston, D. McDevit and K. Roy	0	GWS008744	GQ380373	GQ338127	Le Gall and Saunders, 2010
Stenogramma californicum	British Columbia, Canada; coll. B. Clarkston and S. Toews	0	GWS010565	GQ380375	GQ338125	Le Gall and Saunders, 2010
Stenogramma interruptum	Lorbé, La Coruña, Spain; coll. P. J. L. Geraldino and G. H. Boo	0	CNU062843	na	KU640273	Calderon and Boo, 2016a
Stenogramma lamyi	Manantenina, Madagascar; coll. L. Le Gall	0	MAD2036	KR733111	KR733113	Le Gall et al., 2015
Stenogramma sp.	Kingscote, South Australia, Australia; coll. E. C. Yang and W. J. Lee	0	CNU047638	KU640335	KM262208	Calderon and Boo, 2016a
Stenogramme phyllophoroides	Tasmania, Australia; coll. G. W. Saunders	0	GWS001506	GQ380377	GQ338123	Le Gall and Saunders, 2010
Stenogramme rhodymenioides	British Columbia, Canada; coll. J. Mortimer and G. W. Saunders	0	GWS003014	GQ380384	GQ338126	Le Gall and Saunders, 2010
Chondracanthus intermedius	Taean, Korea; coll. S. M. Boo, 22.viii.2006	0	CNU042987	KU640325	KU640261	Calderon and Boo, 2016a
Chondrus crispus	Cheyne Beach, Devon, England; coll. K. M. Kim and K. M. Lee, 3.iv.2010	0	CNU034179	KU640326	KU640262	Calderon and Boo, 2016a
Mazzaella japonica	Chuksanhang, Yeongdeok, Korea; coll. M. S. Calderon and T. H. Seo	0	CNU057535	KU640331	KU640270	Calderon and Boo, 2016a
* sequences used for estimation of time of divergence
highlighted in grey = sequences used as outgroup
References
Arakaki, N., and Ramirez, M. E. (2021). Mazzaella canaliculata comb. nov. based on Chondrus canaliculatus (Gigartinaceae, Rhodophyta) from Peru and Chile. Phytotaxa. 497(3), 211-228.
Calderon, M. S., and Boo, S. M. (2016a). Phylogeny of Phyllophoraceae (Rhodophyta, Gigartinales) reveals Asterfilopsis gen. nov. from the southern hemisphere. Phycologia. 55(5), 543-554.
Calderon, M. S., and Boo, S. M. (2016b). A new genus Phyllophorella gen. nov. (Phyllophoraceae, Rhodophyta) from central Peru, including Phyllophorella peruviana comb. nov., Phyllophorella humboldtiana sp. nov., and Phyllophorella limaensis sp. nov. Bot. Mar. 59(5), 339-352.
Calderon, M. S., Miller, K. A., Seo, T. H., and Boo, S. M. (2016). Transfer of selected Ahnfeltiopsis (Phyllophoraceae, Rhodophyta) species to the genus Besa and description of Schottera koreana sp. nov. Eur. J. Phycol. 51(4), 431-443.
Calderon, M. S., & Boo, S. M. (2017). The Phyllophoraceae (Gigartinales, Rhodophyta) from Peru with descriptions of Acletoa tarazonae gen. & sp. nov. and Gymnogongrus caespitosus sp. nov. Phycologia. 56(6), 686-696.
Fredericq, S., and Lopez-Bautista, J. (2002). Characterization and phylogenetic position of the red alga Besa papillaeformis Setchell: an example of progenetic heterochrony. Constancea. 83(9), 1-12.
Hommersand, M. H., Fredericq, S., and Freshwater, D. W. (1994). Phylogenetic systematics and biogeography of the Gigartinaceae (Gigartianles, Rhodophyta) based on sequence analysis of rbcL. Bot. Mar. 37, 193-203.
Hommersand, M. H., Fredericq, S., Wilson Freshwater, D., and Hughey, J. (1999). Recent developments in the systematics of the Gigartinaceae (Gigartinales, Rhodophyta) based on rbcL sequence analysis and morphological evidence. Phycol. Res. 47(3), 139-151
Le Gall, L., and Saunders, G. W. (2010). DNA barcoding is a powerful tool to uncover algal diversity: A case study of the Phyllophoraceae (Gigartinales, Rhodophyta) in the Canadian flora. J. Phycol. 46(2), 374-389.
Le Gall, L., Peña, V., Gey, D., Manghisi, A., Dennetiere, B., De Reviers, B., and Rousseau, F. (2015). A new species of Stenogramma was uncovered Indian Ocean during the expedition Atimo Vatae: Stenogramma lamyi sp. nov. Cryptogam. Algol. 36(2), 189-198.
Maggs, C. A., Le Gall, L., Mineur, F., Provan, J., & Saunders, G. W. (2013). Fredericqia deveauniensis, gen. et sp. nov.(Phyllophoraceae, Rhodophyta), a new cryptogenic species. Cryptogam. Algol. 34(3), 273-296.
Montecinos, A., Broitman, B. R., Faugeron, S., Haye, P. A., Tellier, F., and Guillemin, M. -L. (2012). Species replacement along a linear coastal habitat: Phylogeography and speciation in the red alga Mazzaella laminarioides along the south east pacific. BMC Evol. Biol. 12, 97.
Saunders, G. W., Brooks, C. M., and Scott, S. (2019). Preliminary DNA barcode report on the marine red algae (Rhodophyta) from the British Overseas Territory of Tristan da Cunha. Cryptogam. Algol. 40(10), 105-117.
Saunders, G. W., and Millar, K. R. (2014). A DNA barcode survey of the red algal genus Mazzaella in British Columbia reveals overlooked diversity and new distributional records: descriptions of M. dewreedei sp. nov. and M. macrocarpa sp. nov. Botany. 92(3), 223-231.
Schneider, C. W., Chengsupanimit, T., and Saunders, G. W. (2011). A new genus and species from the North Atlantic, Archestenogramma profundum (Phyllophoraceae, Rhodophyta), with taxonomic resolution of the orphaned Leptofauchea brasiliensis. Eur. J. Phycol. 46(4), 442-452.
